# Supplementary material
Source: Research Square preprint supplement (doi:10.21203/rs.3.rs-8058776/v1)
Supplement: Supplementary file 1 [file 6f7f1b96f9c01263b31714a1.docx]

**Table 1.** Baseline characteristics of participants grouped by Cystatin C quartiles. **Page 2**

**Table 2.** Baseline characteristics of the 28-day survivors and non-survivors. **Page 4**

**Table 3.** The association between the Cystatin C and 28-day all-cause mortality and 90-day all-cause mortality in patients with msTBI. **Page 7**

**Table 1** Baseline characteristics of participants grouped by Cystatin C quartiles

| Variables | Total (n = 369) | Q1 (n = 123) | Q2 (n = 125) | Q3 (n = 121) | P value |
| --- | --- | --- | --- | --- | --- |
| Diagnose (%) |  |  |  |  |  |
| SDH | 207 (56.1) | 75 (61.0) | 62 (49.6) | 70 (57.9) | 0.006 |
| EDH | 49 (13.3) | 17 (13.8) | 26 (20.8) | 6 (5.0) |  |
| SAH | 20 (5.4) | 3 (2.4) | 7 (5.6) | 10 (8.3) |  |
| CCL | 93 (25.2) | 28 (22.8) | 30 (24.0) | 35 (28.9) |  |
| Mechanism of injury (%) |  |  |  |  |  |
| Falls | 93 (25.2) | 29 (23.6) | 26 (20.8) | 38 (31.4) | 0.56 |
| FFH | 45 (12.2) | 16 (13.0) | 18 (14.4) | 11 (9.1) |  |
| MVA | 221 (59.9) | 75 (61.0) | 77 (61.6) | 69 (57.0) |  |
| others | 10 (2.7) | 3 (2.4) | 4 (3.2) | 3 (2.5) |  |
| Sex (%) |  |  |  |  |  |
| Male | 128 (34.7) | 63 (51.2) | 32 (25.6) | 33 (27.3) | <0.001 |
| Female | 241 (65.3) | 60 (48.8) | 93 (74.4) | 88 (72.7) |  |
| Age (median [IQR]) | 60.00 [51.00, 70.00] | 54.00 [45.50, 63.50] | 58.00 [50.00, 66.00] | 70.00[58.00,77.00] | <0.001 |
| SBP (median [IQR]) | 134.00 [117.00, 155.00] | 134.00[118.00,147.00] | 138.00[120.00,157.00] | 130.00[102.00,160.00] | 0.146 |
| DBP (median [IQR]) | 77.00 [68.00, 87.00] | 77.00 [70.00, 87.00] | 79.00 [70.00, 89.00] | 73.00 [60.00, 85.00] | 0.002 |
| GCS (median [IQR]) | 7.00 [4.00, 10.00] | 7.00 [4.00, 10.00] | 7.00 [4.00, 10.00] | 5.00 [3.00, 9.00] | 0.097 |
| Comorbidities, n(%) |  |  |  |  |  |
| Pupil diffusion (%) |  |  |  |  |  |
| No | 97 (26.3) | 28 (22.8) | 33 (26.4) | 36 (29.8) | 0.718 |
| Unilateral | 44 (11.9) | 14 (11.4) | 17 (13.6) | 13 (10.7) |  |
| Bilateral | 228 (61.8) | 81 (65.9) | 75 (60.0) | 72 (59.5) |  |
| Midline shift (%) |  |  |  |  |  |
| No | 252 (68.3) | 85 (69.1) | 87 (69.6) | 80 (66.1) | 0.818 |
| Yes | 117 (31.7) | 38 (30.9) | 38 (30.4) | 41 (33.9) |  |
| Hypertension (%) |  |  |  |  |  |
| No | 263 (71.3) | 94 (76.4) | 96 (76.8) | 73 (60.3) | 0.005 |
| Yes | 106 (28.7) | 29 (23.6) | 29 (23.2) | 48 (39.7) |  |
| Diabetes (%) |  |  |  |  |  |
| No | 324 (87.8) | 110 (89.4) | 114 (91.2) | 100 (82.6) | 0.097 |
| Yes | 45 (12.2) | 13 (10.6) | 11 (8.8) | 21 (17.4) |  |
| Lung infection (%) |  |  |  |  |  |
| No | 147 (39.8) | 50 (40.7) | 48 (38.4) | 49 (40.5) | 0.921 |
| Yes | 222 (60.2) | 73 (59.3) | 77 (61.6) | 72 (59.5) |  |
| Liver disease (%) |  |  |  |  |  |
| No | 325 (88.1) | 111 (90.2) | 109 (87.2) | 105 (86.8) | 0.658 |
| Yes | 44 (11.9) | 12 (9.8) | 16 (12.8) | 16 (13.2) |  |
| AKI (%) |  |  |  |  |  |
| No | 313 (84.8) | 112 (91.1) | 111 (88.8) | 90 (74.4) | <0.001 |
| Yes | 56 (15.2) | 11 (8.9) | 14 (11.2) | 31 (25.6) |  |
| Medication |  |  |  |  |  |
| Blood transfusion (%) |  |  |  |  |  |
| No | 311 (84.3) | 113 (91.9) | 112 (89.6) | 86 (71.1) | <0.001 |
| Yes | 58 (15.7) | 10 (8.1) | 13 (10.4) | 35 (28.9) |  |
| Antibiotic use (%) |  |  |  |  |  |
| No | 41 (11.1) | 18 (14.6) | 10 (8.0) | 13 (10.7) | 0.248 |
| Yes | 328 (88.9) | 105 (85.4) | 115 (92.0) | 108 (89.3) |  |
| Mannitol use (%) |  |  |  |  |  |
| No | 232 (62.9) | 79 (64.2) | 73 (58.4) | 80 (66.1) | 0.425 |
| Yes | 137 (37.1) | 44 (35.8) | 52 (41.6) | 41 (33.9) |  |
| Ventilation (%) |  |  |  |  |  |
| No | 83 (22.5) | 24 (19.5) | 30 (24.0) | 29 (24.0) | 0.625 |
| Yes | 286 (77.5) | 99 (80.5) | 95 (76.0) | 92 (76.0) |  |
| CRRT (%) |  |  |  |  |  |
| No | 364 (98.6) | 122 (99.2) | 124 (99.2) | 118 (97.5) | 0.427 |
| Yes | 5 (1.4) | 1 (0.8) | 1 (0.8) | 3 (2.5) |  |
| Neurosurgical operation (%) |  |  |  |  |  |
| No | 96 (26.0) | 28 (22.8) | 30 (24.0) | 38 (31.4) | 0.251 |
| Yes | 273 (74.0) | 95 (77.2) | 95 (76.0) | 83 (68.6) |  |
| Laboratory test |  |  |  |  |  |
| WBC (median [IQR]) | 13.19 [10.58, 16.78] | 13.20 [11.32, 17.12] | 12.50 [10.17, 15.76] | 13.37 [10.61, 17.37] | 0.106 |
| PLT (median [IQR]) | 137.00[104.00, 183.00] | 146.00[109.50,200.50] | 141.00[109.00,188.00] | 128.00 [99.00, 165.00] | 0.037 |
| UA (median [IQR]) | 300.00[231.00, 363.00] | 267.00[200.00,336.00] | 306.00[235.00,353.00] | 339.00[260.00,402.00] | <0.001 |
| BUN (median [IQR]) | 5.77 [4.82, 6.93] | 4.97 [4.19, 5.80] | 5.60 [4.98, 6.61] | 6.80 [6.08, 8.06] | <0.001 |
| Cystatin C (median [IQR]) | 0.79 [0.62, 1.00] | 0.58 [0.50, 0.62] | 0.80 [0.75, 0.85] | 1.13 [1.00, 1.38] | <0.001 |
| K (median [IQR]) | 3.79 [3.49, 4.09] | 3.70 [3.44, 3.99] | 3.79 [3.46, 4.16] | 3.87 [3.56, 4.25] | 0.008 |
| Na (median [IQR]) | 141.70[139.50, 144.00] | 141.10[139.10,143.10] | 142.10[139.70,144.10] | 142.20[139.60,144.40] | 0.079 |
| Glucose (median [IQR]) | 9.37 [7.46, 11.46] | 9.41 [7.68, 11.34] | 8.70 [7.43, 10.40] | 9.92 [7.37, 13.67] | 0.064 |
| CRP (median [IQR]) | 5.80 [1.83, 9.27] | 4.23 [1.01, 7.11] | 5.41 [1.93, 7.89] | 5.90 [3.04, 16.99] | 0.001 |
| Ca (mean (SD)) | 2.07 (0.17) | 2.08 (0.17) | 2.08 (0.14) | 2.04 (0.19) | 0.144 |
| ALT (median [IQR]) | 22.00 [16.00, 35.00] | 22.00 [15.00, 32.50] | 21.00 [17.00, 32.00] | 24.00 [15.00, 39.00] | 0.572 |
| Albumin (median [IQR]) | 20.60 [17.60, 24.60] | 20.20 [18.00, 23.40] | 20.70 [17.50, 24.00] | 21.00 [17.60, 26.00] | 0.793 |
| Creatinine (median [IQR]) | 66.00 [55.00, 80.00] | 54.00 [45.50, 62.50] | 66.00 [60.00, 74.00] | 89.00 [73.00, 102.00] | <0.001 |
| AST (mean (SD)) | 33.00 [26.00, 50.00] | 34.00 [25.00, 49.50] | 32.00 [26.00, 42.00] | 35.00 [27.00, 68.00] | 0.038 |
| Events |  |  |  |  |  |
| statu_28 (%) |  |  |  |  |  |
|  | 262 (71.0) | 105 (85.4) | 97 (77.6) | 60 (49.6) | <0.001 |
|  | 107 (29.0) | 18 (14.6) | 28 (22.4) | 61 (50.4) |  |
| statu_90 (%) |  |  |  |  |  |
|  | 255 (69.1) | 101 (82.1) | 96 (76.8) | 58 (47.9) | <0.001 |
|  | 114 (30.9) | 22 (17.9) | 29 (23.2) | 63 (52.1) |  |
| Los ICU (median [IQR]) | 9.00 [3.00, 16.00] | 10.00 [3.50, 17.00] | 9.00 [4.00, 17.00] | 6.00 [3.00, 14.00] | 0.126 |
| ICU status (%) |  |  |  |  |  |
|  | 276 (74.8) | 102 (82.9) | 103 (82.4) | 71 (58.7) | <0.001 |
|  | 93 (25.2) | 21 (17.1) | 22 (17.6) | 50 (41.3) |  |
| Los hospital (median [IQR]) | 23.00 [12.00, 34.00] | 26.00 [16.00, 36.00] | 24.00 [16.00, 35.00] | 17.00 [6.00, 30.00] | <0.001 |
| Hospital status (%) |  |  |  |  |  |
|  | 270 (73.2) | 102 (82.9) | 101 (80.8) | 67 (55.4) | <0.001 |
|  | 99 (26.8) | 21 (17.1) | 24 (19.2) | 54 (44.6) |  |

Abbreviations: SDH, Subdural Hematoma; EDH, Epidural Hematoma; SAH, Subarachnoid Hemorrhage; CCL, Cerebral Contusion and Laceration; FFH, Fall from Height; MVA, Motor Vehicle Accident; SBP, Systolic Blood Pressure; DBP, Diastolic Blood Pressure; GCS, Glasgow Coma Scale; WBC, White Blood Cell Count; PLT, Platelet Count; UA, Uric Acid; BUN, Blood Urea Nitrogen; CRP, C-Reactive Protein; ALT, Alanine Transaminase; AST, Aspartate Aminotransferase.

**Table 2** Baseline characteristics of the 28-day survivors and non-survivors

| Variables | Total (n =369) | Survivors  (n =262) | Non-survivors  (n = 107) | P value |
| --- | --- | --- | --- | --- |
| Diagnose (%) |  |  |  |  |
| SDH | 207 (56.1) | 139 (53.1) | 68 (63.6) | 0.199 |
| EDH | 49 (13.3) | 40 (15.3) | 9 (8.4) |  |
| SAH | 20 (5.4) | 14 (5.3) | 6 (5.6) |  |
| CCL | 93 (25.2) | 69 (26.3) | 24 (22.4) |  |
| Mechanism of injury (%) |  |  |  |  |
| Falls | 93 (25.2) | 61 (23.3) | 32 (29.9) | 0.594 |
| FFH | 45 (12.2) | 32 (12.2) | 13 (12.1) |  |
| MVA | 221 (59.9) | 162 (61.8) | 59 (55.1) |  |
| others | 10 (2.7) | 7 (2.7) | 3 (2.8) |  |
| Sex (%) |  |  |  |  |
| Male | 128 (34.7) | 92 (35.1) | 36 (33.6) | 0.882 |
| Female | 241 (65.3) | 170 (64.9) | 71 (66.4) |  |
| Age (median [IQR]) | 60.00 [51.00, 70.00] | 57.00 [47.00, 68.00] | 65.00 [55.00, 74.00] | <0.001 |
| SBP (median [IQR]) | 134.00[117.00,155.00] | 138.00[122.00,157.00] | 122.00[99.50,146.50] | <0.001 |
| DBP (median [IQR]) | 77.00 [68.00, 87.00] | 78.00 [70.00, 88.00] | 72.00 [55.50, 84.00] | <0.001 |
| GCS (median [IQR]) | 7.00 [4.00, 10.00] | 8.00 [5.00, 10.00] | 4.00 [3.00, 5.50] | <0.001 |
| Comorbidities, n(%) |  |  |  |  |
| Pupil diffusion (%) |  |  |  |  |
| No | 97 (26.3) | 40 (15.3) | 57 (53.3) | <0.001 |
| Unilateral | 44 (11.9) | 31 (11.8) | 13 (12.1) |  |
| Bilateral | 228 (61.8) | 191 (72.9) | 37 (34.6) |  |
| Midline shift (%) |  |  |  |  |
| No | 252 (68.3) | 203 (77.5) | 49 (45.8) | <0.001 |
| Yes | 117 (31.7) | 59 (22.5) | 58 (54.2) |  |
| Hypertension (%) |  |  |  |  |
| No | 263 (71.3) | 187 (71.4) | 76 (71.0) | 1 |
| Yes | 106 (28.7) | 75 (28.6) | 31 (29.0) |  |
| Diabetes (%) |  |  |  |  |
| No | 324 (87.8) | 235 (89.7) | 89 (83.2) | 0.119 |
| Yes | 45 (12.2) | 27 (10.3) | 18 (16.8) |  |
| Lung infection (%) |  |  |  |  |
| No | 147 (39.8) | 95 (36.3) | 52 (48.6) | 0.038 |
| Yes | 222 (60.2) | 167 (63.7) | 55 (51.4) |  |
| Liver disease (%) |  |  |  |  |
| No | 325 (88.1) | 227 (86.6) | 98 (91.6) | 0.249 |
| Yes | 44 (11.9) | 35 (13.4) | 9 (8.4) |  |
| AKI (%) |  |  |  |  |
| No | 313 (84.8) | 232 (88.5) | 81 (75.7) | 0.003 |
| Yes | 56 (15.2) | 30 (11.5) | 26 (24.3) |  |
| Medication |  |  |  |  |
| Blood transfusion (%) |  |  |  |  |
| No | 311 (84.3) | 234 (89.3) | 77 (72.0) | <0.001 |
| Yes | 58 (15.7) | 28 (10.7) | 30 (28.0) |  |
| Antibiotic use (%) |  |  |  |  |
| No | 41 (11.1) | 28 (10.7) | 13 (12.1) | 0.823 |
| Yes | 328 (88.9) | 234 (89.3) | 94 (87.9) |  |
| Mannitol use (%) |  |  |  |  |
| No | 232 (62.9) | 168 (64.1) | 64 (59.8) | 0.51 |
| Yes | 137 (37.1) | 94 (35.9) | 43 (40.2) |  |
| Ventilation (%) |  |  |  |  |
| No | 83 (22.5) | 76 (29.0) | 7 (6.5) | <0.001 |
| Yes | 286 (77.5) | 186 (71.0) | 100 (93.5) |  |
| CRRT (%) |  |  |  |  |
| No | 364 (98.6) | 261 (99.6) | 103 (96.3) | 0.042 |
| Yes | 5 (1.4) | 1 (0.4) | 4 (3.7) |  |
| Neurosurgical operation (%) |  |  |  |  |
| No | 96 (26.0) | 72 (27.5) | 24 (22.4) | 0.383 |
| Yes | 273 (74.0) | 190 (72.5) | 83 (77.6) |  |
| Laboratory test |  |  |  |  |
| WBC (median [IQR]) | 13.19 [10.58, 16.78] | 13.11 [10.76, 16.82] | 13.35 [10.25, 16.44] | 0.538 |
| PLT (median [IQR]) | 137.00[104.00,183.00] | 151.00[114.50,196.50] | 111.00[81.00,137.00] | <0.001 |
| UA (median [IQR]) | 300.00[231.00,363.00] | 290.00[220.50,358.50] | 322.00[253.50,374.00] | 0.022 |
| BUN (median [IQR]) | 5.77 [4.82, 6.93] | 5.47 [4.67, 6.57] | 6.64 [5.49, 8.31] | <0.001 |
| Cystatin C (median [IQR]) | 0.79 [0.62, 1.00] | 0.75 [0.60, 0.89] | 0.94 [0.77, 1.30] | <0.001 |
| K (median [IQR]) | 3.79 [3.49, 4.09] | 3.81 [3.49, 4.09] | 3.76 [3.49, 4.09] | 0.813 |
| Na (median [IQR]) | 141.70[139.50,144.00] | 141.30[139.22,143.60] | 142.80[140.30,144.75] | 0.005 |
| Glucose (median [IQR]) | 9.37 [7.46, 11.46] | 9.02 [7.21, 11.02] | 10.28 [8.28, 13.43] | 0.001 |
| CRP (median [IQR]) | 5.80 [1.83, 9.27] | 5.30 [1.58, 8.80] | 5.90 [2.21, 11.77] | 0.17 |
| Ca (mean (SD)) | 2.07 (0.17) | 2.10 (0.16) | 2.00 (0.18) | <0.001 |
| ALT (median [IQR]) | 22.00 [16.00, 35.00] | 22.00 [16.00, 35.00] | 22.00 [15.00, 35.00] | 0.667 |
| Albumin (median [IQR]) | 20.60 [17.60, 24.60] | 21.00 [18.00, 24.78] | 18.90 [15.15, 22.60] | <0.001 |
| Creatinine (median [IQR]) | 66.00 [55.00, 80.00] | 63.00 [52.25, 75.00] | 75.00 [61.00, 97.50] | <0.001 |
| AST (mean (SD)) | 33.00 [26.00, 50.00] | 32.00 [25.00, 47.00] | 40.00 [29.00, 57.50] | 0.002 |

Abbreviations: SDH, Subdural Hematoma; EDH, Epidural Hematoma; SAH, Subarachnoid Hemorrhage; CCL, Cerebral Contusion and Laceration; FFH, Fall from Height; MVA, Motor Vehicle Accident; SBP, Systolic Blood Pressure; DBP, Diastolic Blood Pressure; GCS, Glasgow Coma Scale; WBC, White Blood Cell Count; PLT, Platelet Count; UA, Uric Acid; BUN, Blood Urea Nitrogen; CRP, C-Reactive Protein; ALT, Alanine Transaminase; AST, Aspartate Aminotransferase.

**Table.3** The association between the Cystatin C and 28-day all-cause mortality and 90-day all-cause mortality in patients with msTBI

| **Variables** | **Model 1** | | |  | **Model 2** | | |  | **Model 3** | | |
| --- | --- | --- | --- | --- | --- | --- | --- | --- | --- | --- | --- |
| **OR（95% CI)** | ***P value*** | ***P-trend*** |  | **OR（95% CI)** | ***P value*** | ***P-trend*** |  | **OR（95% CI)** | ***P value*** | ***P-trend*** |
| **28-day all-cause mortality** |  |  |  |  |  |  |  |  |  |  |  |
| Continuous variable  per unit | 9.02 (5.11, 15.9) | <0.001 |  |  | 7.33 (3.87, 13.9) | <0.001 |  |  | 6.15 (1.85, 20.5) | 0.003 |  |
| Quantile **a** |  |  | <0.001 |  |  |  | <0.001 |  |  |  | 0.020 |
| Q1 (n=123) | Ref |  |  |  |  |  |  |  |  |  |  |
| Q2 (n=125) | 1.59 (0.88, 2.88) | 0.900 |  |  | 1.57 (0.86, 2.88) | 0.145 |  |  | 1.43 (0.74, 2.75) | 0.283 |  |
| Q3 (n=121) | 4.45 (2.63, 7.53) | <0.001 |  |  | 3.80 (2.12, 6.80) | <0.001 |  |  | 2.47 (1.15, 5.29) | 0.020 |  |
|  |  |  |  |  |  |  |  |  |  |  |  |
| **90-day all-cause mortality** |  |  |  |  |  |  |  |  |  |  |  |
| Continuous variable  per unit | 8.41 (4.82, 14.6) | <0.001 |  |  | 7.29 (3.92, 13.6) | <0.001 |  |  | 5.84 (1.83, 18.6) | 0.003 |  |
| Quantile **a** |  |  | <0.001 |  |  |  | <0.001 |  |  |  | 0.036 |
| Q1 (n=123) | Ref |  |  |  |  |  |  |  |  |  |  |
| Q2 (n=125) | 1.35 (0.78, 2.35) | 0.286 |  |  | 1.38 (0.78, 2.43) | 0.271 |  |  | 1.23 (0.67, 2.28) | 0.503 |  |
| Q3 (n=121) | 3.82 (2.35, 6.22) | <0.001 |  |  | 3.44 (2.00, 5.92) | <0.001 |  |  | 2.16 (1.05, 4.45) | 0.036 |  |

***a*** *Cystatin C: Q1 (0.16.–0.69), Q2 (0.69–0.90), Q3 (0.90–1.57).*

*Model 1: unadjusted*

*Model 2: adjusted for age and sex*

*Model 3: adjusted for* *age, sex,* *Blood transfusion, hypertension, AKI, PLT,* *Albumin, creatinine, BUN, Glucose, UA, AST,* *DBP, CRP, K*
