# Supplementary material
Source: Research Square preprint supplement (doi:10.21203/rs.3.rs-8058776/v1)
Supplement: Supplementary file 2 [file 8f5938ca7549343cb7a108a0.docx]

**Supplementary Material**

**Fig.S1.** Variable missing value overview. **Page 2**

**Fig.S2.** Variance inflation factor between variables. **Page 3**

**Fig.S3.** Calibration curves for four different models. **Page 4**

**Fig.S4.** Decision Curve Analysis (DCA) plot. **Page 5**

**Table S1.** Cox analyses: risk factors of 28-day all-cause mortality. **Page 6**

**Table S2.** Cox analyses: risk factors of 90-day all-cause mortality. **Page 8**

**Table S3.** Hyperparameters for four models. **Page 10**

| 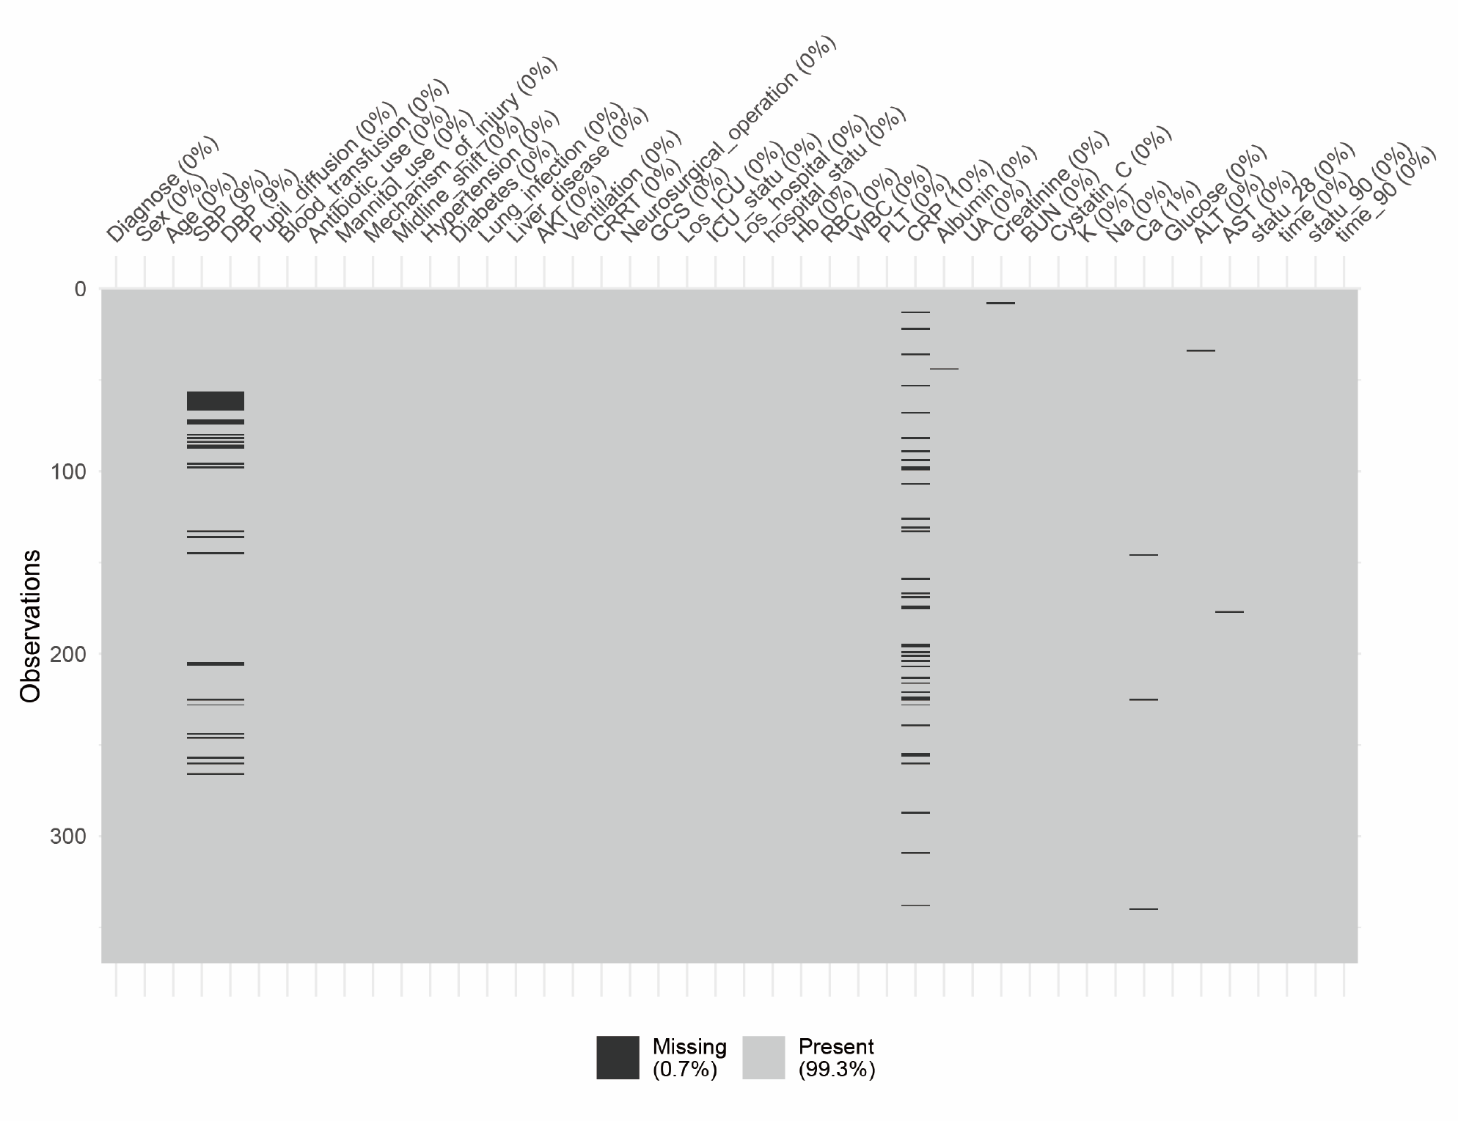 |
| --- |
| **Fig.S1. Variable missing value overview.** The figure is a missing value plot, which illustrates the missing value status of each variable within the dataset. The horizontal axis represents different variables, while the vertical axis indicates the number of observations. The bar for each variable is divided into two segments: the black segment denotes the number of missing values, and the grey segment represents the number of non-missing values. |

| 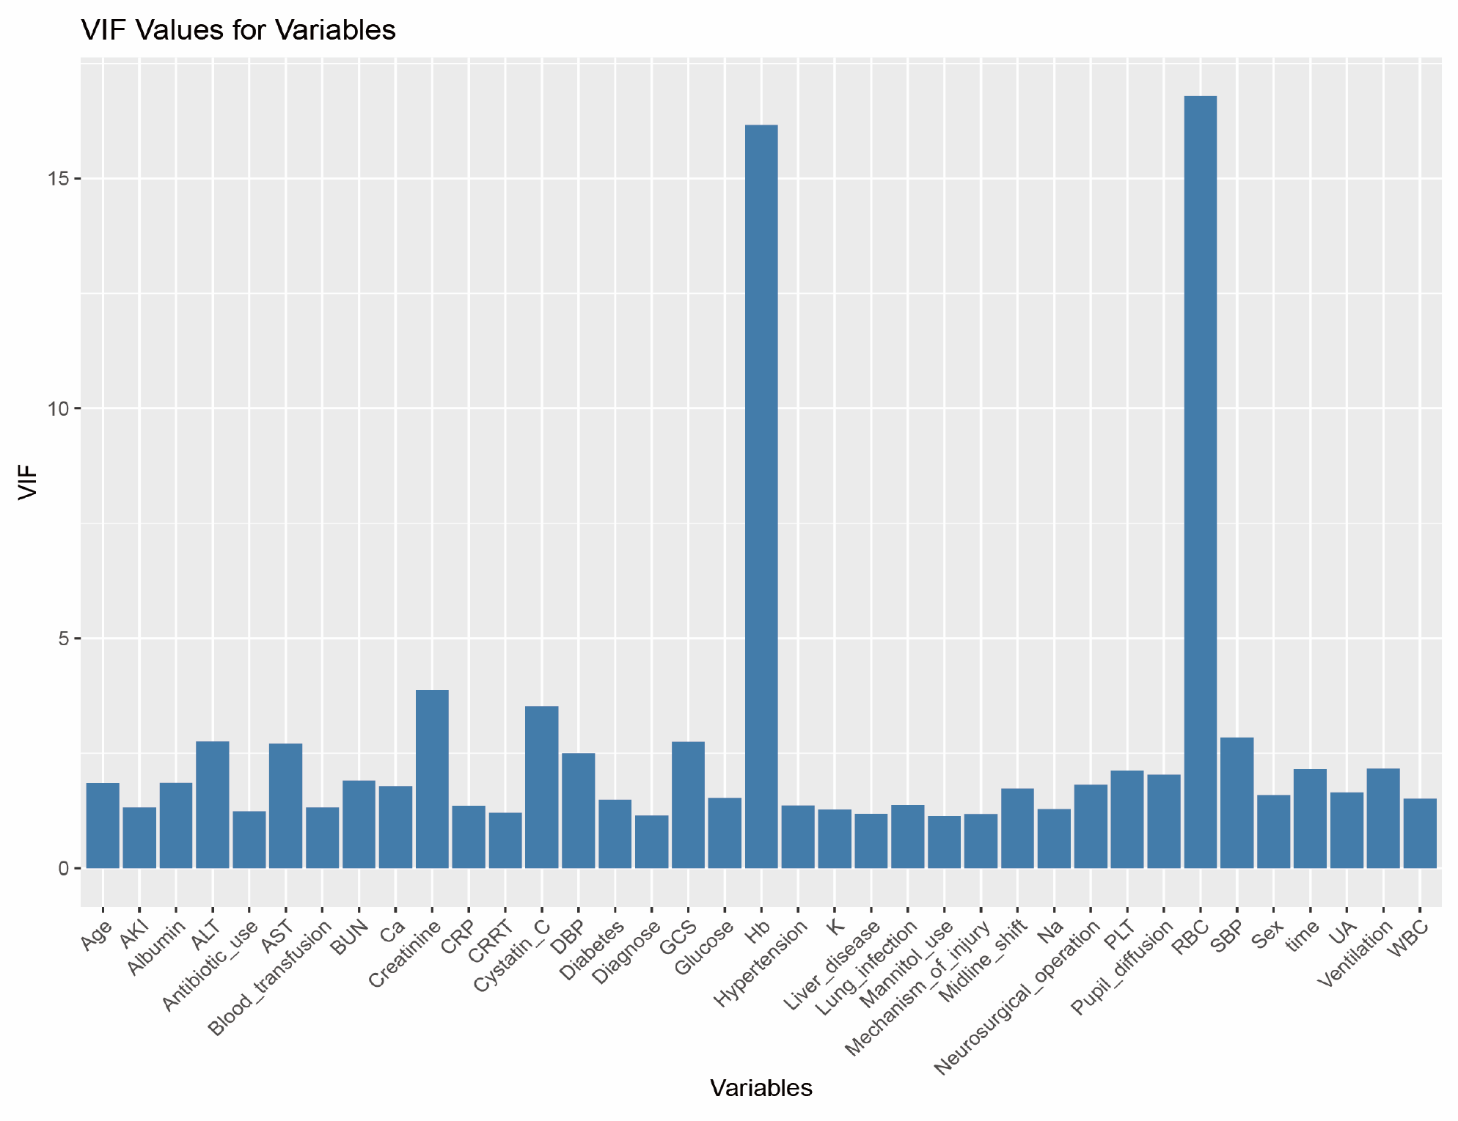 |
| --- |
| **Fig.S2. Variance inflation factor between variables.** This figure is a bar chart of the Variance Inflation Factor (VIF), which is used to assess the multicollinearity among independent variables in a multiple linear regression model. The horizontal axis represents the different independent variables; the vertical axis represents the VIF values for each independent variable. |

| 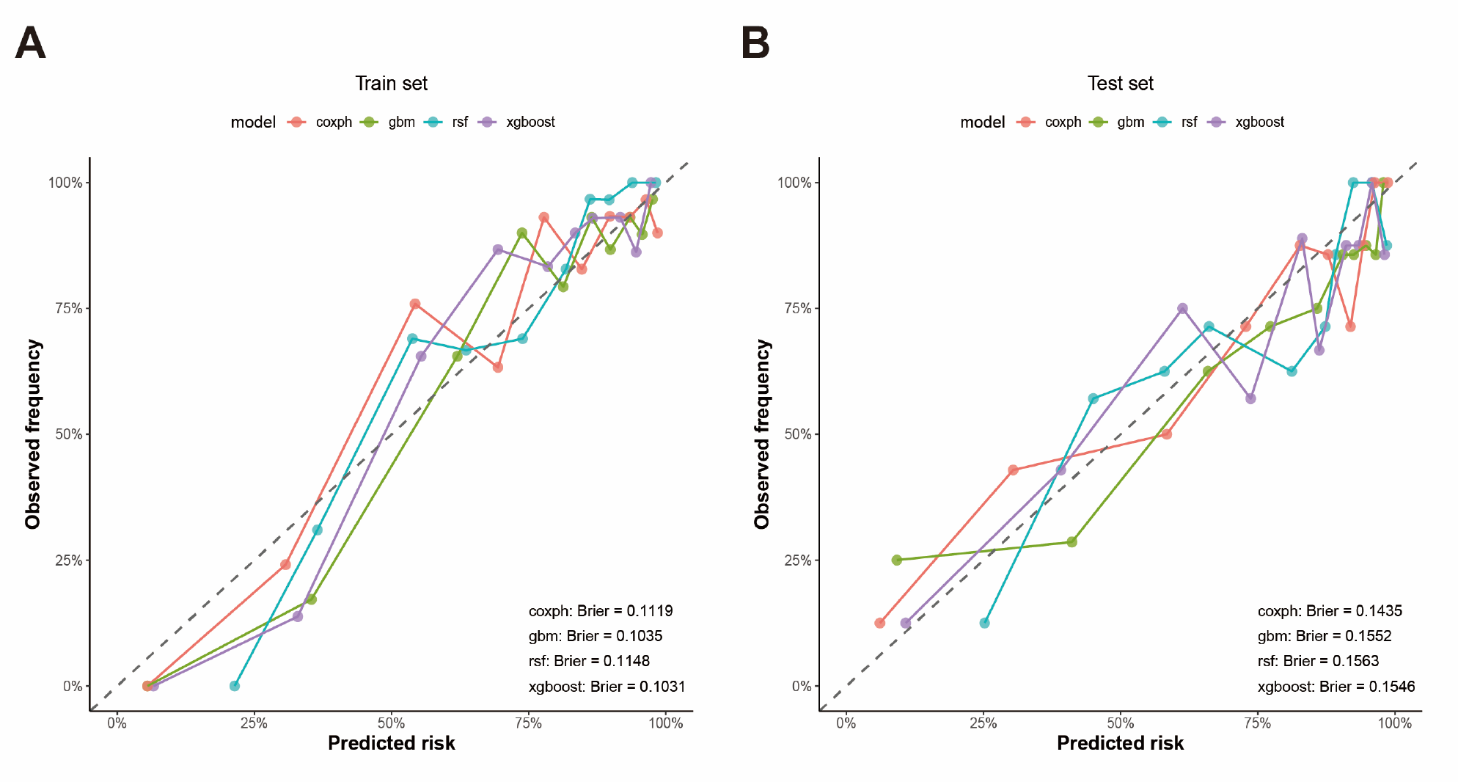 |
| --- |
| **Fig.S3. Calibration curves for four different models.** (A) Training set, (B) Test set. If the calibration curve of a model is close to the dashed line (the diagonal), it indicates that the predicted risk of the model is consistent with the actual observed risk, and the calibration performance of the model is good. The Brier score is shown in the lower right corner; the lower the score, the more accurate the prediction. |

| 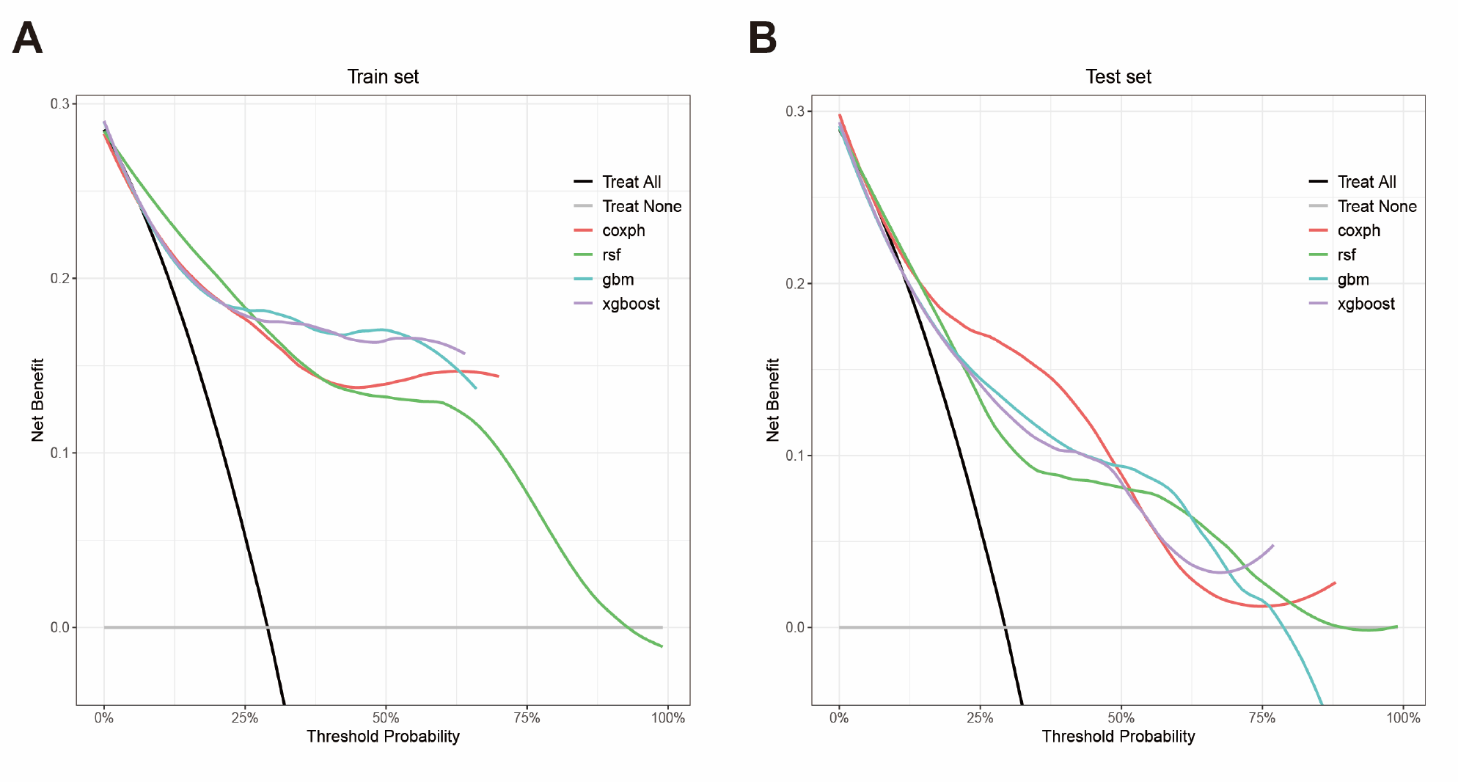 |
| --- |
| **Fig.S4.** **Decision Curve Analysis (DCA) plot.** The x-axis represents the threshold probability for clinical decision-making. The y-axis represents the net benefit at a specific threshold probability. (A) Decision curve analysis results on the training set, (B) Decision curve analysis results on the training set. Treat All: Black curve, strategy of intervening on all individuals. Treat None: Grey curve, strategy of not intervening on any individuals. coxph: Red curve, representing the curve based on the Cox proportional hazards model. rsf: Green curve, representing the curve based on the random survival forest model. gbm: Cyan curve, representing the curve based on the gradient boosting machine model. xgboost: Purple curve, representing the curve based on the extreme gradient boosting model. |

**Table S1 Cox analyses: risk factors of 28-day all-cause mortality**

| Variables | Univariate cox analysis |  | Multivariate cox analysis |  |
| --- | --- | --- | --- | --- |
|  | OR (95% CI) | P-value | OR (95% CI) | P-value |
| Diagnose |  |  |  |  |
|  | refer |  |  |  |
|  | 0.521(0.260-1.044) | 0.066 |  |  |
|  | 0.88(0.382-2.028) | 0.764 |  |  |
|  | 0.785(0.493-1.250) | 0.308 |  |  |
| Mechanism of injury |  |  |  |  |
|  | refer |  |  |  |
|  | 0.802(0.421-1.528) | 0.502 |  |  |
|  | 0.733(0.477-1.128) | 0.158 |  |  |
|  | 0.746(0.229-2.437) | 0.628 |  |  |
| Sex |  |  |  |  |
|  | refer |  |  |  |
|  | 1.016(0.680-1.517) | 0.939 |  |  |
| Age | 1.033(1.018-1.048) | <0.001 | 1.044(1.024-1.064) | <0.001 |
| SBP | 0.983(0.977-0.990) | <0.001 | 0.991(0.979-1.002) | 0.11 |
| DBP | 0.973(0.962-0.984) | <0.001 | 1.004(0.984-1.024) | 0.717 |
| GCS | 0.728(0.671-0.790) | <0.001 | 0.815(0.720-0.922) | 0.001 |
| Comorbidities, |  |  |  |  |
| Pupil diffusion |  |  |  |  |
|  | refer |  | refer |  |
|  | 0.381(0.208-0.696) | 0.002 | 0.748(0.380-1.471) | 0.399 |
|  | 0.197(0.130-0.298) | <0.001 | 0.586(0.318-1.078) | 0.086 |
| Midline shift |  |  |  |  |
|  | refer |  | refer |  |
|  | 3.231(2.207-4.731) | <0.001 | 1.291(0.812-2.052) | 0.281 |
| Hypertension |  |  |  |  |
|  | refer |  | refer |  |
|  | 1.017(0.670-1.544) | 0.938 | 0.933(0.490-1.775) | 0.832 |
| Diabetes |  |  |  |  |
|  | refer |  |  |  |
|  | 1.614(0.972-2.679) | 0.064 |  |  |
| Lung infection |  |  |  |  |
|  | refer |  | refer |  |
|  | 0.595(0.407-0.869) | 0.007 | 0.331(0.216-0.506) | <0.001 |
| Liver disease |  |  |  |  |
|  | refer |  |  |  |
|  | 0.602(0.304-1.191) | 0.145 |  |  |
| AKI |  |  |  |  |
|  | refer |  |  |  |
|  | 1.821(1.170-2.834) | 0.008 | 0.654(0.387-1.106) | 0.113 |
| Medication |  |  |  |  |
| Blood transfusion |  |  |  |  |
|  | refer |  | refer |  |
|  | 2.451(1.606-3.740) | <0.001 | 0.749(0.445-1.259) | 0.275 |
| Antibiotic use |  |  |  |  |
|  | refer |  |  |  |
|  | 0.815(0.456-1.455) | 0.488 |  |  |
| Mannitol use |  |  |  |  |
|  | refer |  |  |  |
|  | 1.15(0.781-1.692) | 0.479 |  |  |
| Ventilation |  |  |  |  |
|  | refer |  | refer |  |
|  | 4.937(2.294-10.625) | <0.001 | 2.093(0.859-5.098) | 0.104 |
| CRRT |  |  |  |  |
|  | refer |  | refer |  |
|  | 3.444(1.266-9.369) | 0.015 | 2.369(0.786-7.142) | 0.126 |
| Neurosurgical operation |  |  |  |  |
|  | refer |  |  |  |
|  | 1.242(0.789-1.956) | 0.35 |  |  |
| Laboratory test |  |  |  |  |
| WBC | 0.985(0.945-1.026) | 0.456 |  |  |
| PLT | 0.986(0.982-0.990) | <0.001 | 0.998(0.994-1.003) | 0.442 |
| UA | 1.002(1.000-1.004) | 0.021 | 1.002(1.000-1.004) | 0.073 |
| BUN | 1.388(1.251-1.541) | <0.001 | 1.101(0.944-1.284) | 0.219 |
| Cystatin C | 9.024(5.106-15.949) | <0.001 | 6.735(2.163-20.971) | 0.001 |
| K | 1.022(0.678-1.541) | 0.916 |  |  |
| Na | 1.077(1.022-1.135) | 0.006 | 1.042(0.989-1.099) | 0.121 |
| Glucose | 1.119(1.062-1.179) | <0.001 | 1.032 (0.979-1.089) | 0.239 |
| CRP | 1.017(0.990-1.044) | 0.224 |  |  |
| Ca | 0.051(0.017-0.155) | <0.001 | 0.369(0.086-1.577) | 0.179 |
| ALT | 0.999(0.987-1.011) | 0.823 |  |  |
| Albumin | 0.929(0.893-0.966) | <0.001 | 0.985(0.938-1.034) | 0.536 |
| Creatinine | 1.026(1.018-1.035) | <0.001 | 0.983(0.965-1.001) | 0.071 |
| AST | 1.013(1.004-1.021) | 0.003 |  |  |

Abbreviations: SDH, Subdural Hematoma; EDH, Epidural Hematoma; SAH, Subarachnoid Hemorrhage; CCL, Cerebral Contusion and Laceration; FFH, Fall from Height; MVA, Motor Vehicle Accident; SBP, Systolic Blood Pressure; DBP, Diastolic Blood Pressure; GCS, Glasgow Coma Scale; WBC, White Blood Cell Count; PLT, Platelet Count; UA, Uric Acid; BUN, Blood Urea Nitrogen; CRP, C-Reactive Protein; ALT, Alanine Transaminase; AST, Aspartate Aminotransferase.

**Table S2 Cox analyses: risk factors of 90-day all-cause mortality**

| Variables | Univariate cox analysis |  | Multivariate cox analysis |  |
| --- | --- | --- | --- | --- |
|  | OR (95%CI) | P-value | OR (95%CI) | P-value |
| Diagnose |  |  |  |  |
|  | refer |  |  |  |
|  | 0.535(0.276-1.035) | 0.063 |  |  |
|  | 0.819(0.356-1.882) | 0.638 |  |  |
|  | 0.757(0.481-1.192) | 0.23 |  |  |
| Mechanism of injury |  |  |  |  |
|  | refer |  |  |  |
|  | 0.87(0.474-1.597) | 0.653 |  |  |
|  | 0.722(0.475-1.098) | 0.128 |  |  |
|  | 0.705(0.217-2.297) | 0.562 |  |  |
| Sex |  |  |  |  |
|  | refer |  |  |  |
|  | 0.918(0.626-1.346) | 0.662 |  |  |
| Age | 1.03(1.016-1.044) | <0.001 | 1.042(1.023-1.062) | <0.001 |
| SBP | 0.983(0.977-0.990) | <0.001 | 0.99(0.979-1.001) | 0.078 |
| DBP | 0.973(0.962-0.984) | <0.001 | 1.006(0.986-1.026) | 0.555 |
| GCS | 0.66(0.6-0.73) | <0.001 | 0.805(0.715-0.907) | <0.001 |
| Comorbidities |  |  |  |  |
| Pupil diffusion |  |  |  |  |
|  | refer |  | refer |  |
|  | 0.35(0.192-0.637) | 0.001 | 0.701(0.360-1.367) | 0.297 |
|  | 0.194(0.130-0.290) | <0.001 | 0.577(0.320-1.041) | 0.068 |
| Midline shift |  |  |  |  |
|  | refer |  | refer |  |
|  | 3.076(2.127-4.447) | <0.001 | 1.182(0.754-1.851) | 0.466 |
| Hypertension |  |  |  |  |
|  | refer |  | refer |  |
|  | 1.015(0.677-1.522) | 0.942 | 0.933(0.490-1.775) | 0.832 |
| Diabetes |  |  |  |  |
|  | refer |  |  |  |
|  | 1.503(0.908-2.487) | 0.113 |  |  |
| Lung infection |  |  |  |  |
|  | refer |  | refer |  |
|  | 0.604(0.418-0.872) | 0.007 | 0.32(0.212-0.484) | <0.001 |
| Liver disease |  |  |  |  |
|  | refer |  | refer |  |
|  | 0.772(0.424-1.404) | 0.396 | 1.56(0.63-3.89) | 0.334 |
| AKI |  |  |  |  |
|  | refer |  |  |  |
|  | 1.978(1.297-3.017) | 0.002 | 0.724(0.439-1.195) | 0.207 |
| Medication |  |  |  |  |
| Blood transfusion |  |  |  |  |
|  | refer |  | refer |  |
|  | 2.386(1.578-3.608) | <0.001 | 0.737(0.444-1.223) | 0.237 |
| Antibiotic use |  |  |  |  |
|  | refer |  |  |  |
|  | 0.879(0.494-1.567) | 0.663 |  |  |
| Mannitol use |  |  |  |  |
|  | refer |  |  |  |
|  | 1.161(0.799-1.688) | 0.434 |  |  |
| Ventilation |  |  |  |  |
|  | refer |  | refer |  |
|  | 5.347(2.488-11.490) | <0.001 | 2.299(0.954-5.537) | 0.064 |
| CRRT |  |  |  |  |
|  | refer |  | refer |  |
|  | 4.248(1.729-10.438) | 0.002 | 2.68(0.983-7.308) | 0.054 |
| Neurosurgical operation |  |  |  |  |
|  | refer |  |  |  |
|  | 1.283(0.823-2.000) | 0.271 |  |  |
| Laboratory test |  |  |  |  |
| WBC | 1.01(0.99-1.04) | 0.365 |  |  |
| PLT | 0.982(0.944-1.022) | 0.382 | 0.999(0.995-1.003) | 0.477 |
| UA | 0.987(0.983-0.991) | <0.001 | 1.002(1.000-1.004) | 0.075 |
| BUN | 1.002(1.000-1.004) | 0.026 | 1.126(0.970-1.307) | 0.118 |
| Cystatin C | 1.381(1.247-1.528) | <0.001 | 7.211(2.397-21.689) | <0.001 |
| K | 8.405(4.824-14.646) | <0.001 |  |  |
| Na | 1.054(0.709-1.569) | 0.794 | 1.044(0.993-1.099) | 0.094 |
| Glucose | 1.089(1.035-1.145) | 0.001 | 1.03(0.977-1.085) | 0.271 |
| CRP | 1.019(0.993-1.046) | 0.15 |  |  |
| Ca | 0.055(0.019-0.160) | <0.001 | 0.346(0.085-1.413) | 0.139 |
| ALT | 0.999(0.988-1.011) | 0.932 | 1(1.000-1.001) | 0.25 |
| Albumin | 0.932(0.897-0.968) | <0.001 | 0.988(0.942-1.035) | 0.607 |
| Creatinine | 1.025(1.016-1.033) | <0.001 | 0.981(0.963-0.998) | 0.031 |
| AST | 1.014(1.006-1.022) | 0.001 | 1.007(0.998-1.016) | 0.147 |

Abbreviations: SDH, Subdural Hematoma; EDH, Epidural Hematoma; SAH, Subarachnoid Hemorrhage; CCL, Cerebral Contusion and Laceration; FFH, Fall from Height; MVA, Motor Vehicle Accident; SBP, Systolic Blood Pressure; DBP, Diastolic Blood Pressure; GCS, Glasgow Coma Scale; WBC, White Blood Cell Count; PLT, Platelet Count; UA, Uric Acid; BUN, Blood Urea Nitrogen; CRP, C-Reactive Protein; ALT, Alanine Transaminase; AST, Aspartate Aminotransferase.

**Table S3. Hyperparameters for four models**

| **Model** | **Hyperparameter** |
| --- | --- |
| cox proportional hazards (coxph) | none |
| random survival forest (rsf) | ntree = 200, mtry =3, nodesize =15 |
| gradient boosting machine (gbm) | trees=300, depth=1, minobsinnode=5, shrinkage= 0.0505 |
| extreme gradient boosting (xgboost) | nrounds = 375, max depth = 1, eta = 0.03746623 |
